# Supplementary material for: Indium triflate catalyzed microwave-assisted alkenylation of methoxyphenols: synthesis of indenes and chromenes
Source: Royal Society of Chemistry journal article supplement (doi:10.1039/c5ob01734c), 2015-01-01

## Supporting information

### Indium triflate Catalyzed Microwave-Assisted Alkenylation of Methoxyphenols: Synthesis of Indenes and Chromenes

V. Kameswara Rao,<sup>a</sup> Pinku Kaswan,<sup>a</sup> Keykavous Parang<sup>b</sup> and Anil Kumar<sup>a,\*</sup>

<sup>a</sup>Department of Chemistry, Birla Institute of Technology and Science, Pilani 333031, Rajasthan, India

<sup>b</sup>School of Pharmacy, Chapman University, One University Drive, Orange, CA 92866

e-mail: anilkumar@pilani.bits-pilani.ac.in

#### Contents

1. Copy of <sup>1</sup>H NMR and <sup>13</sup>C NMR spectra of **4a-e** and **5a-j**.
2. COSY, HSQC and HMQC spectra of **5i**.

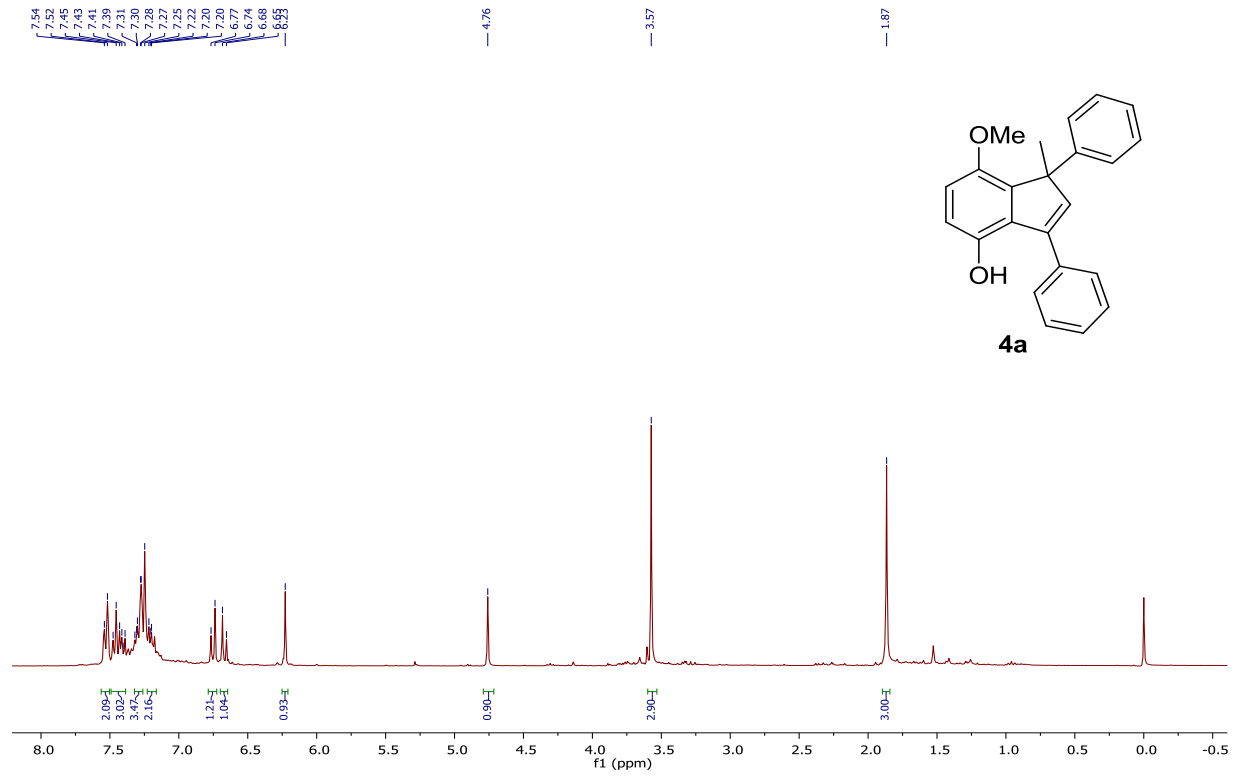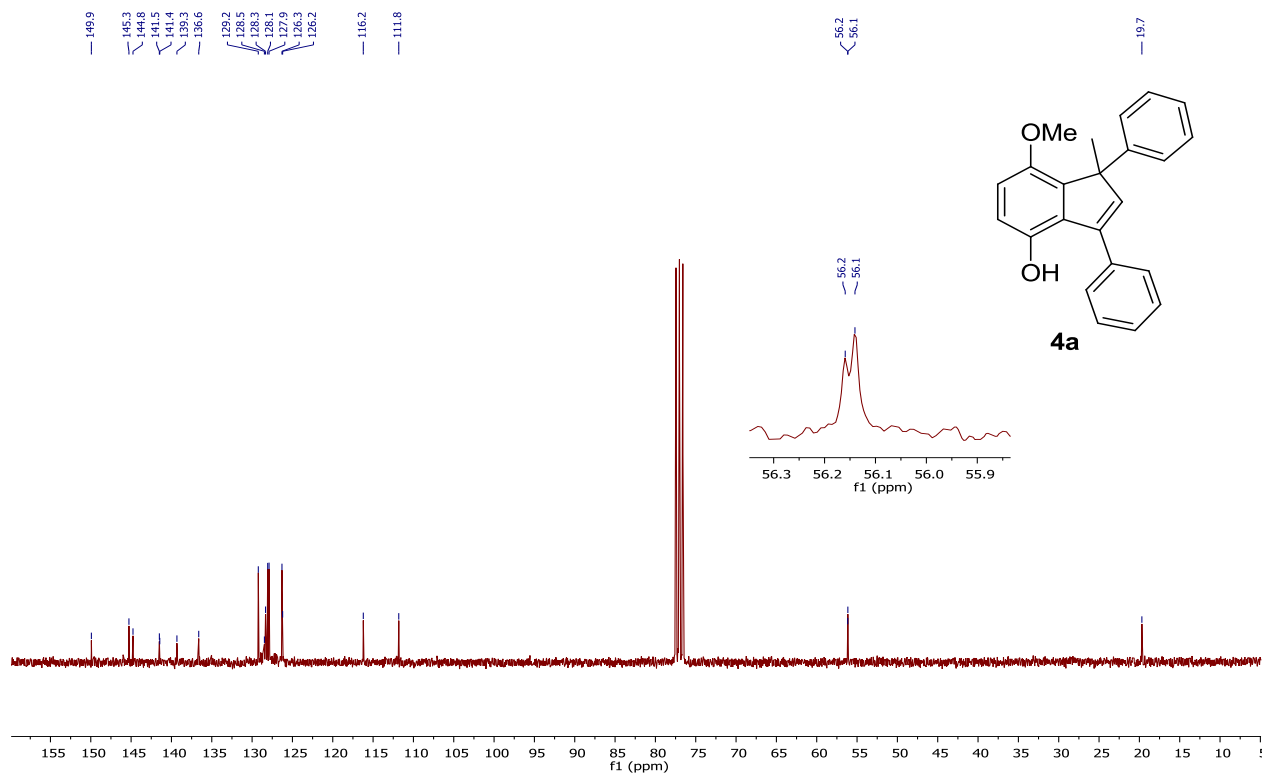

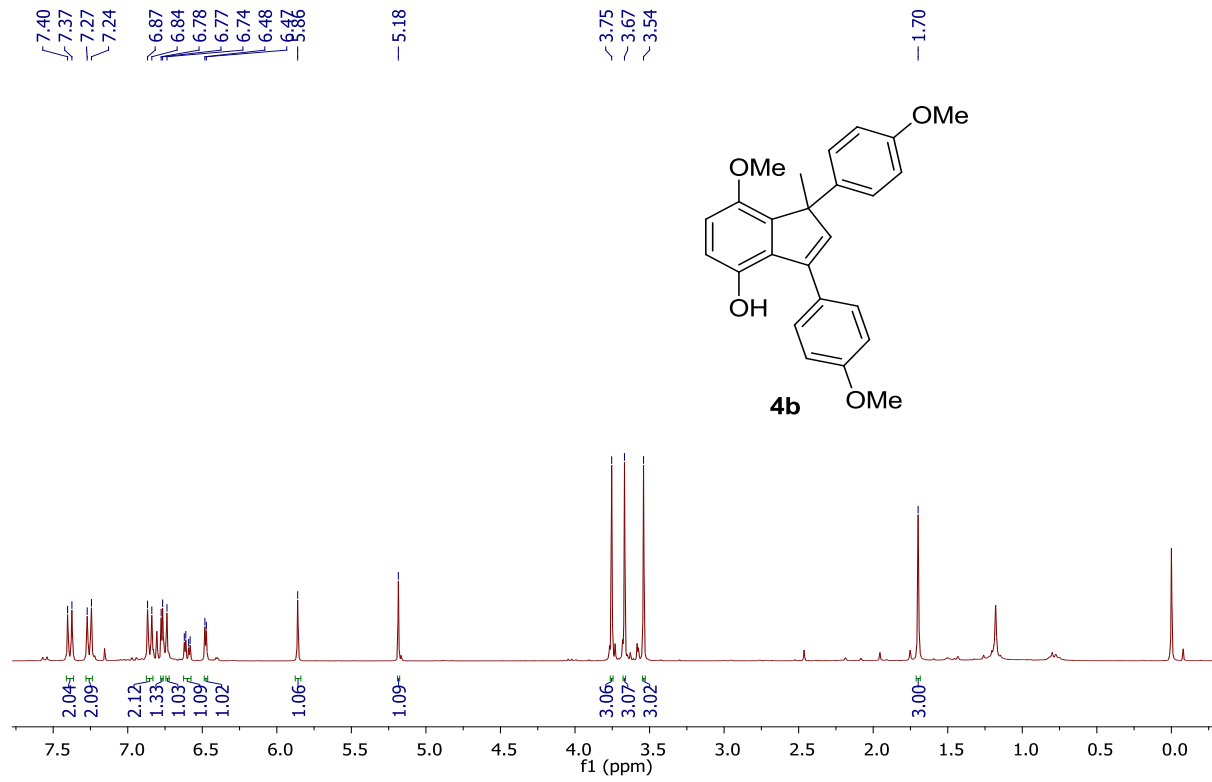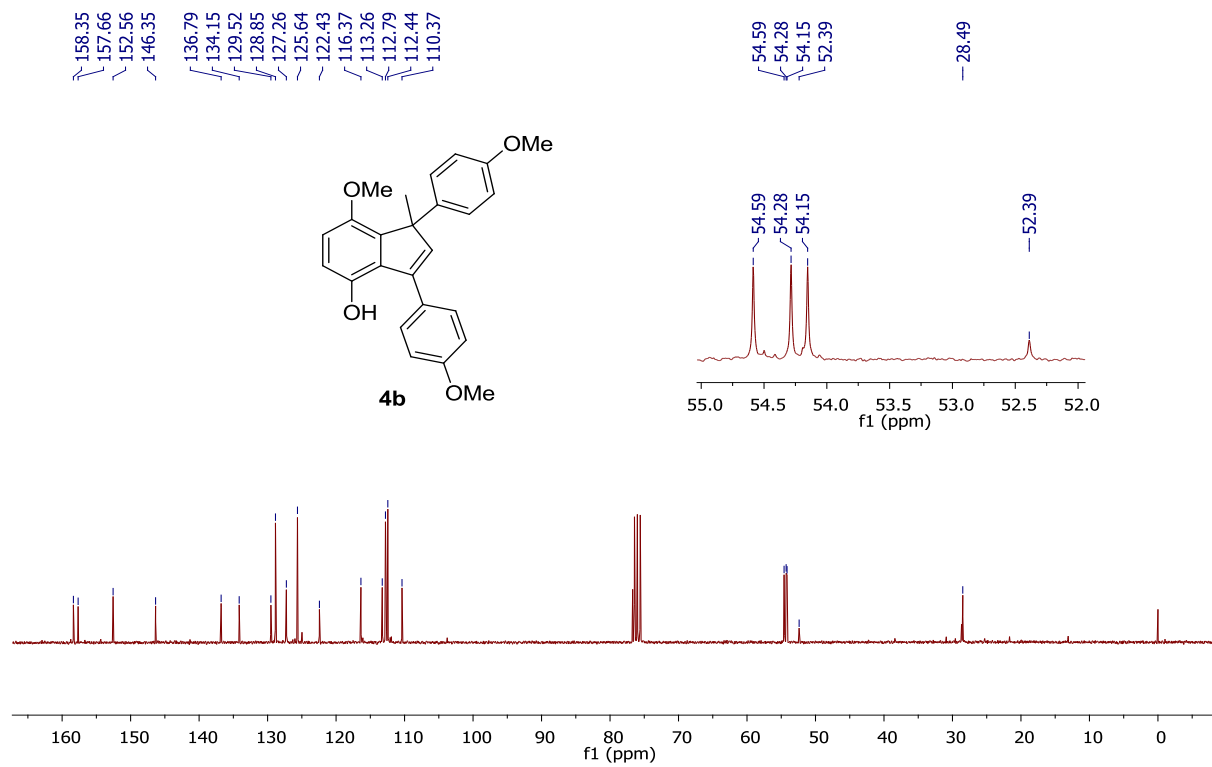

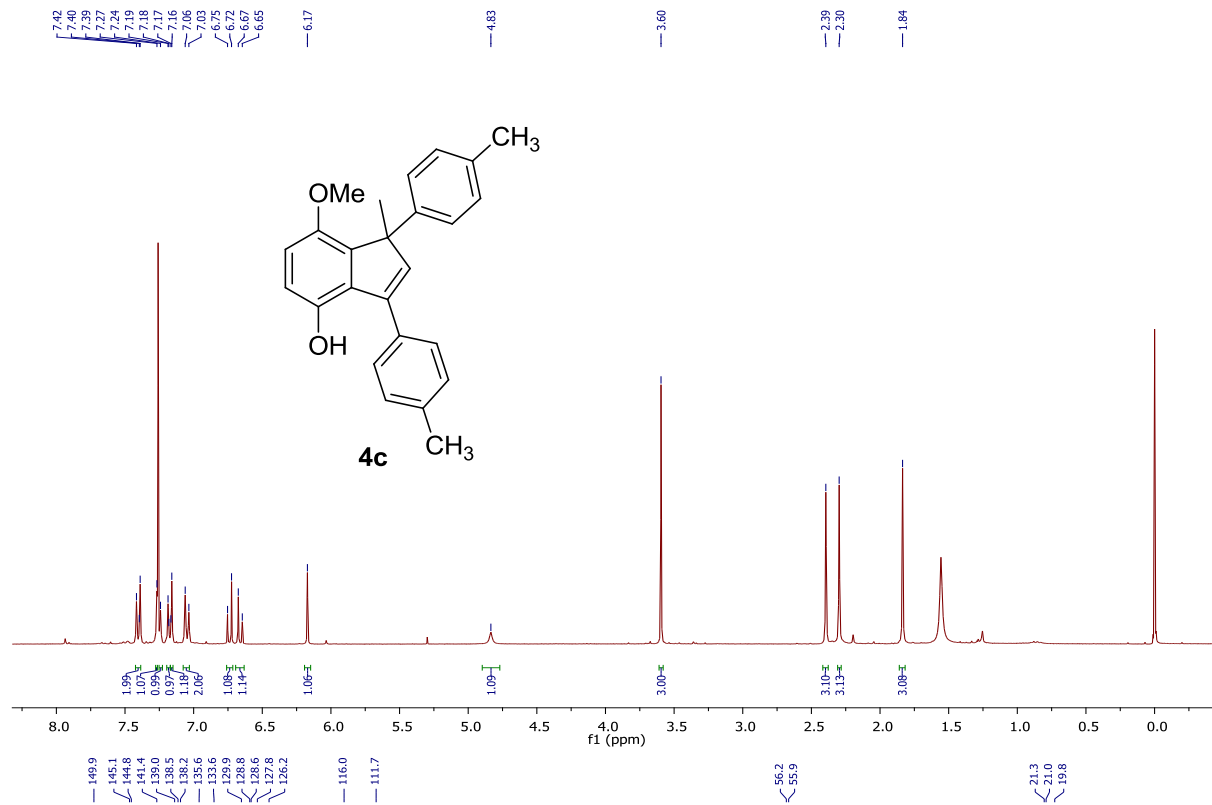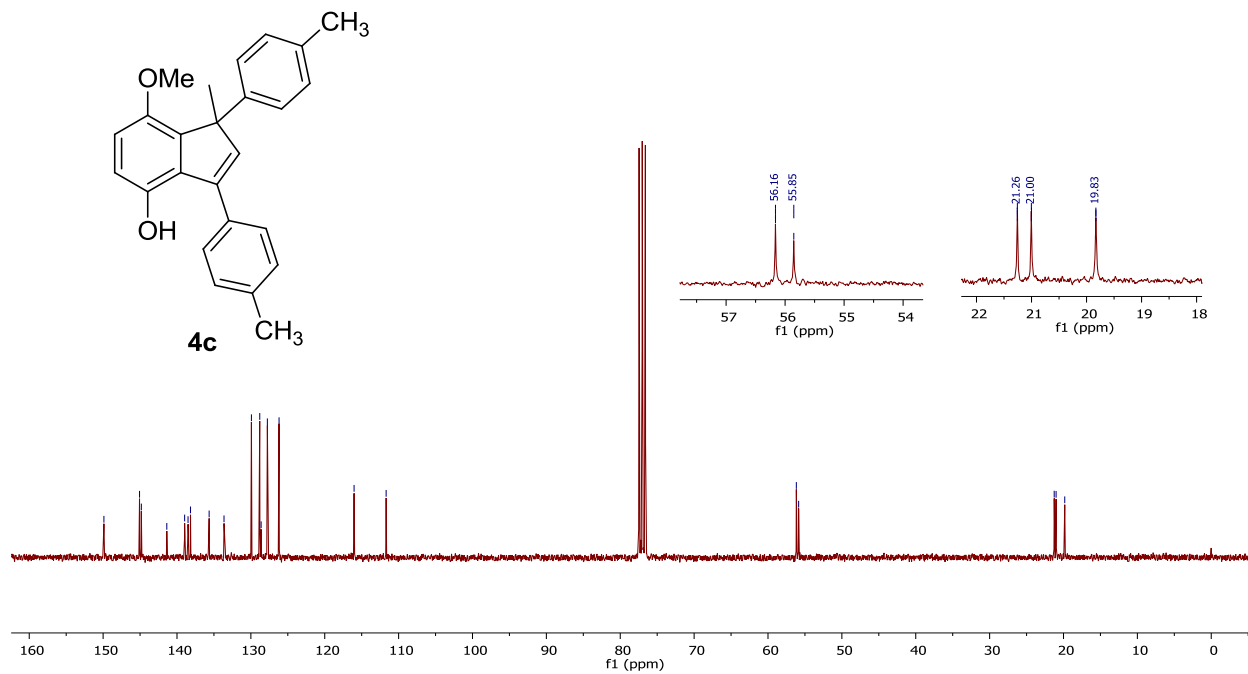

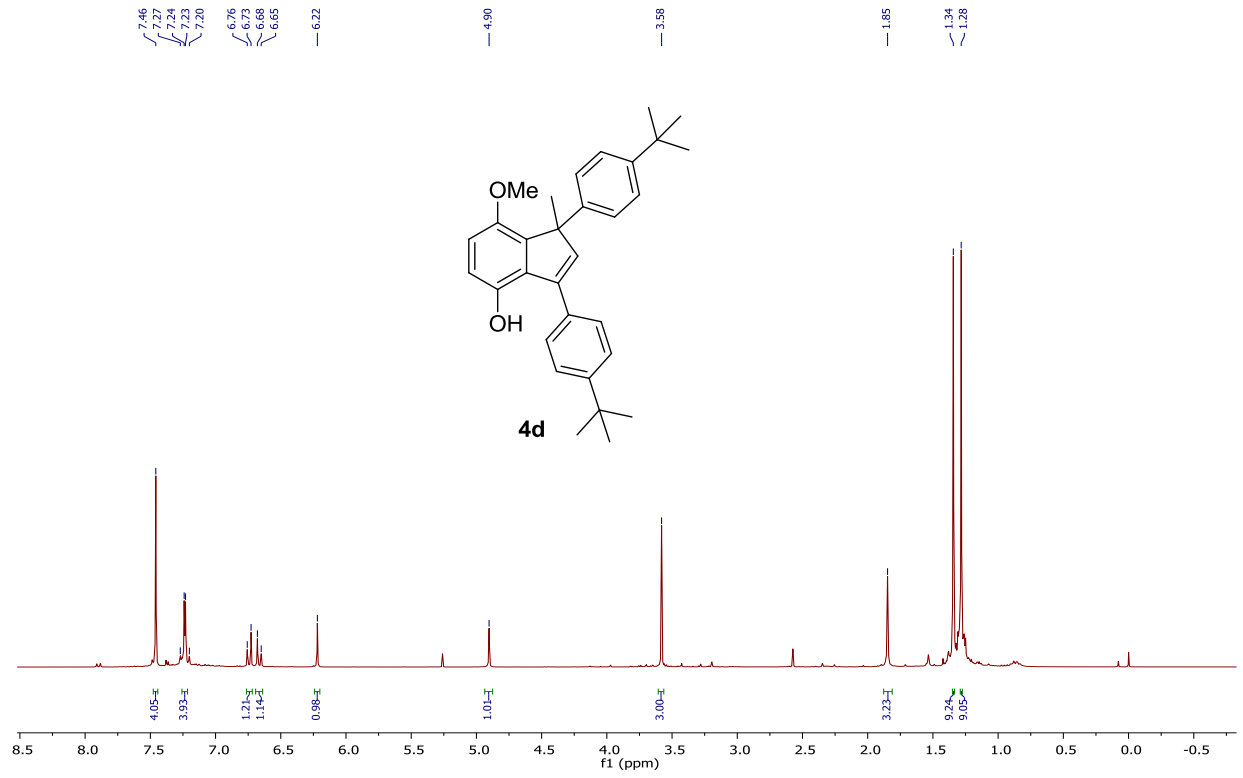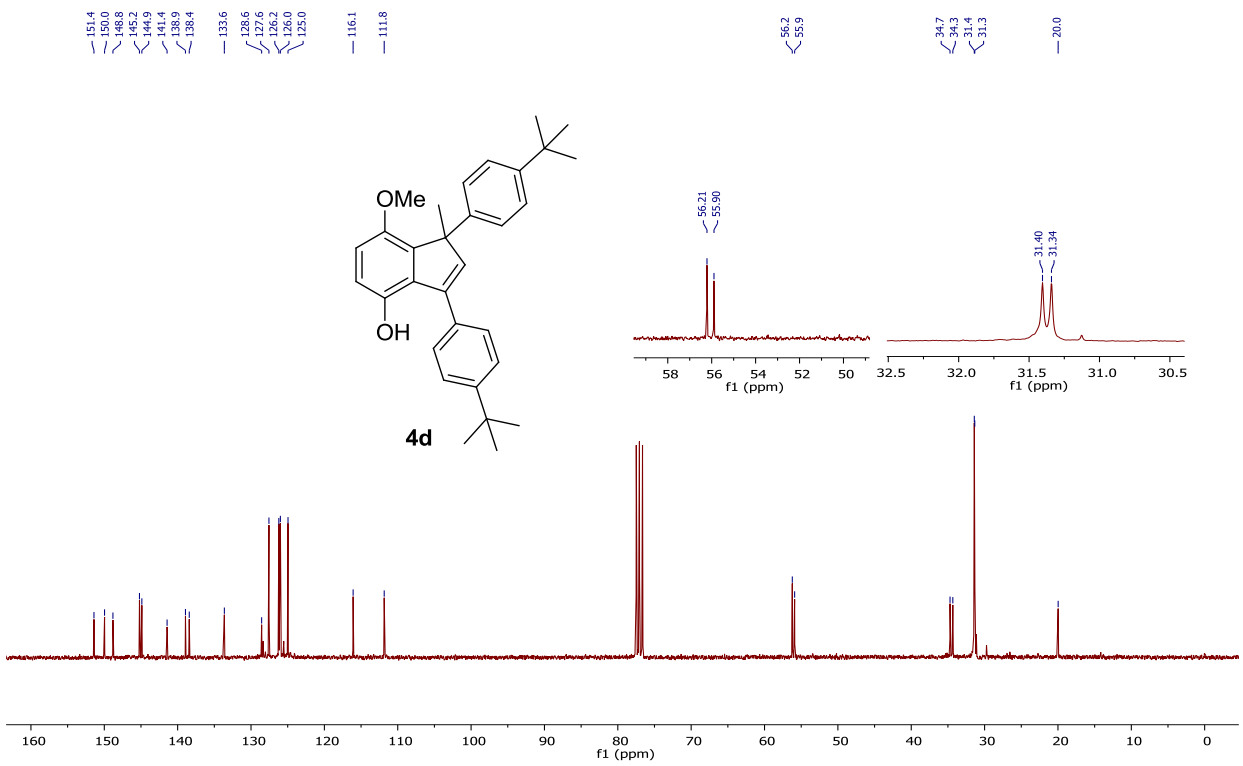





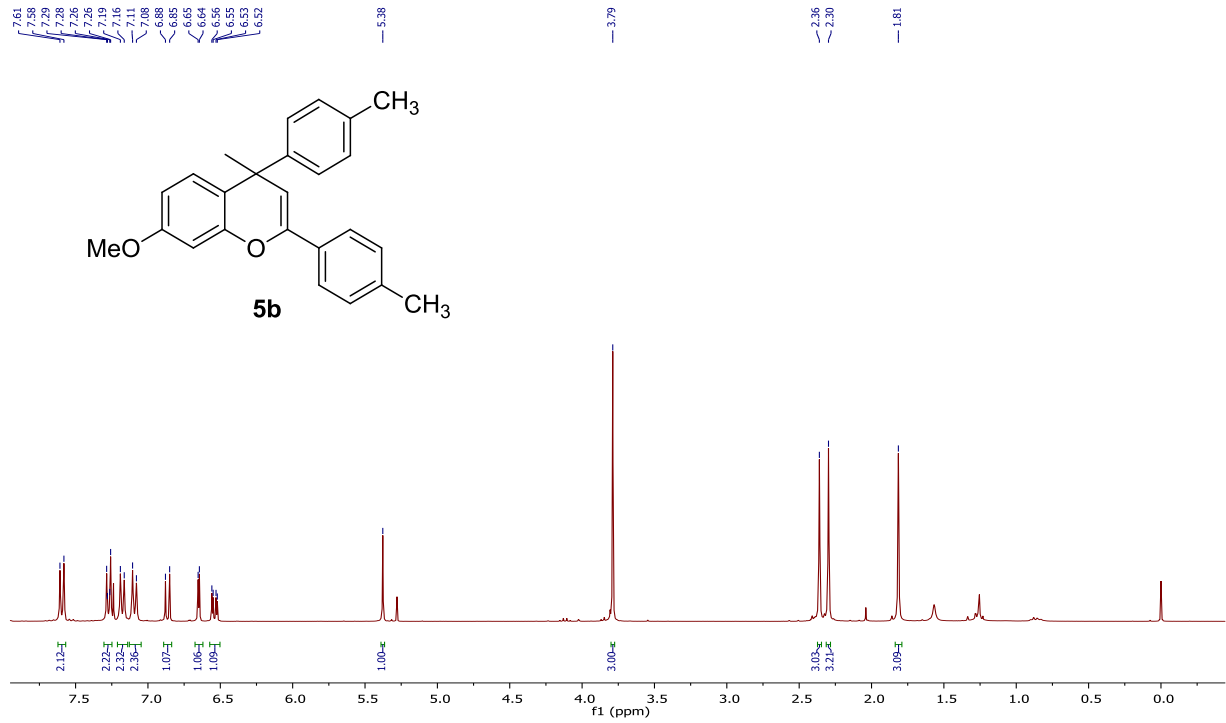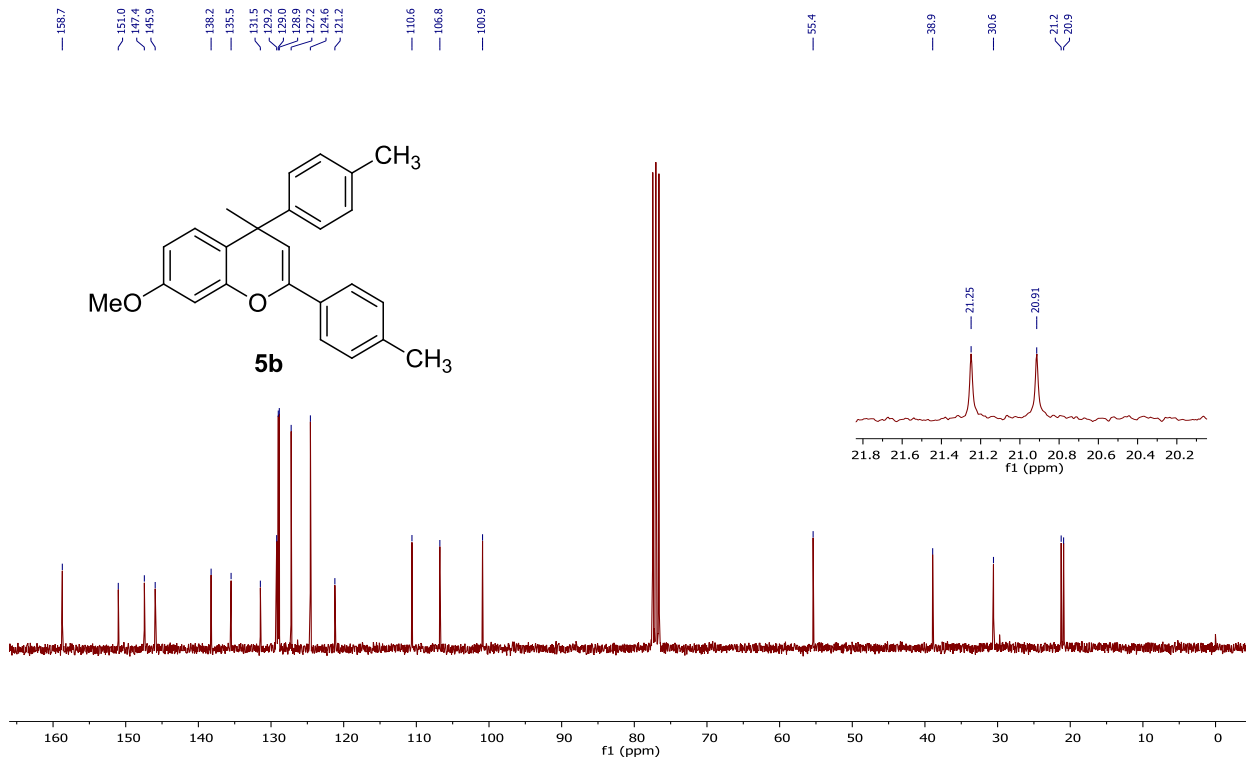



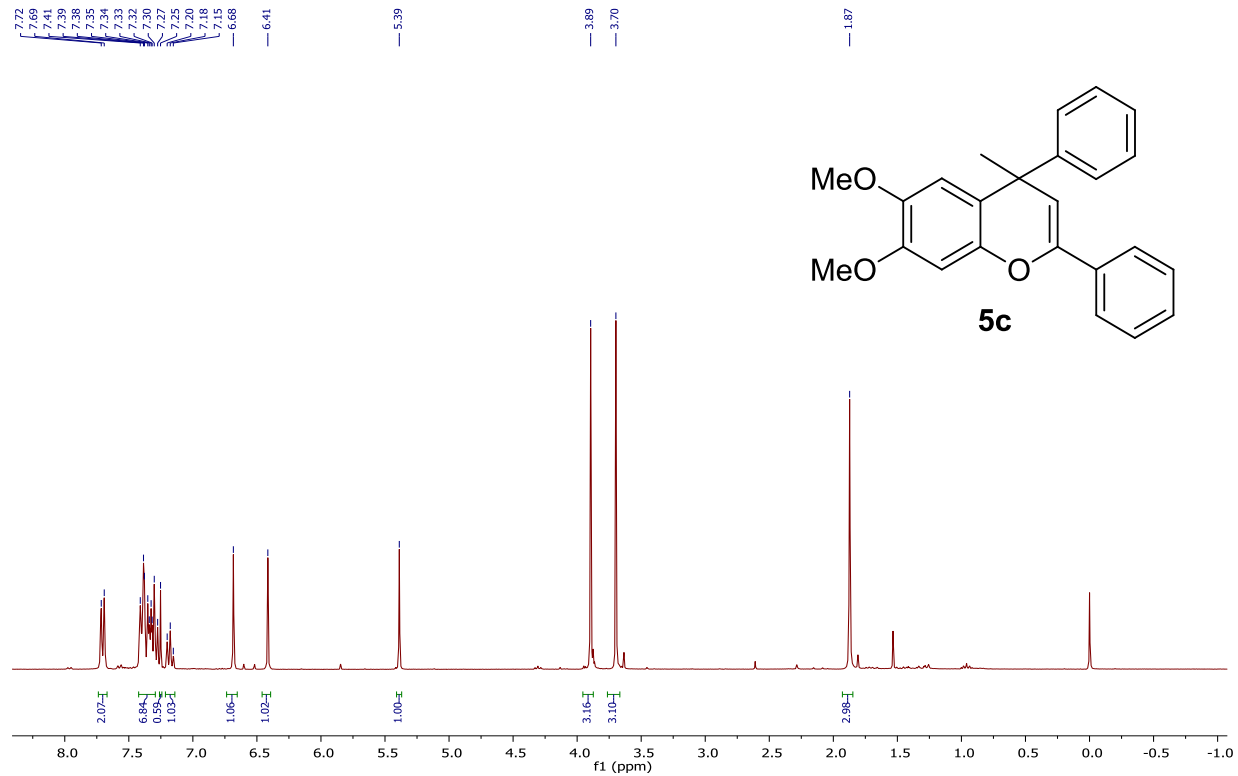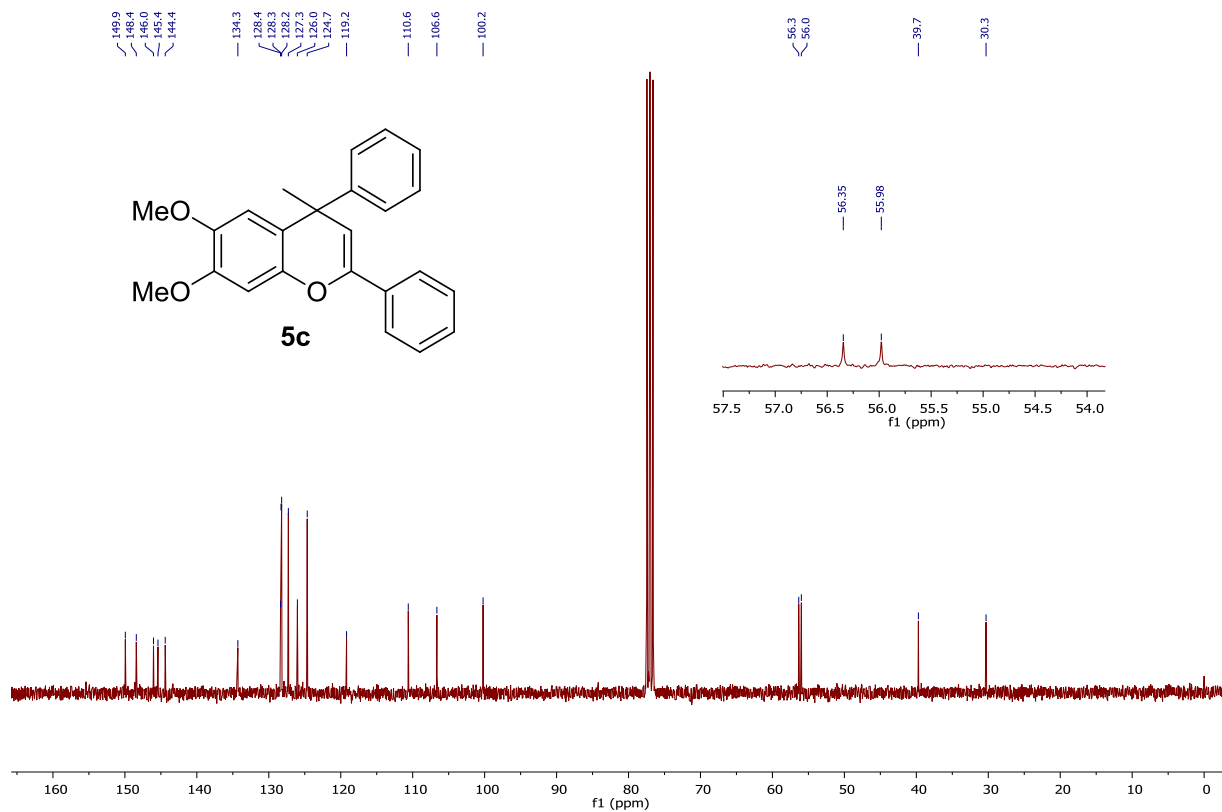

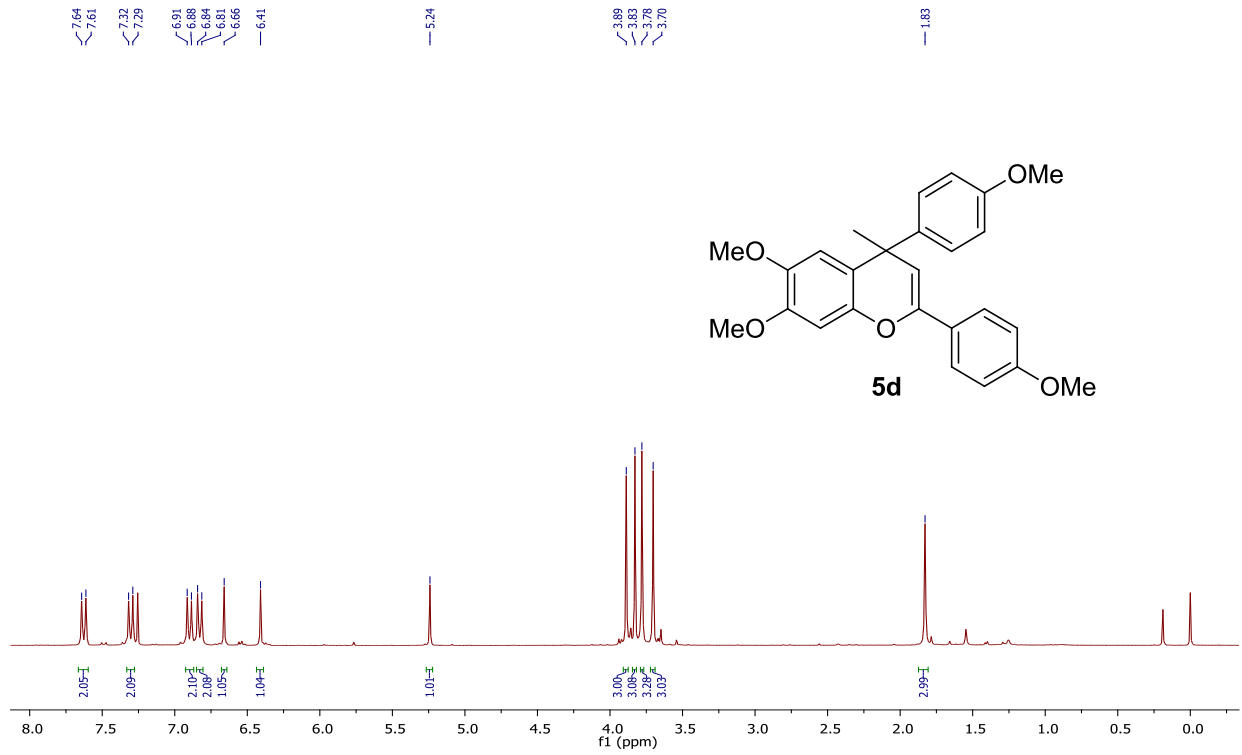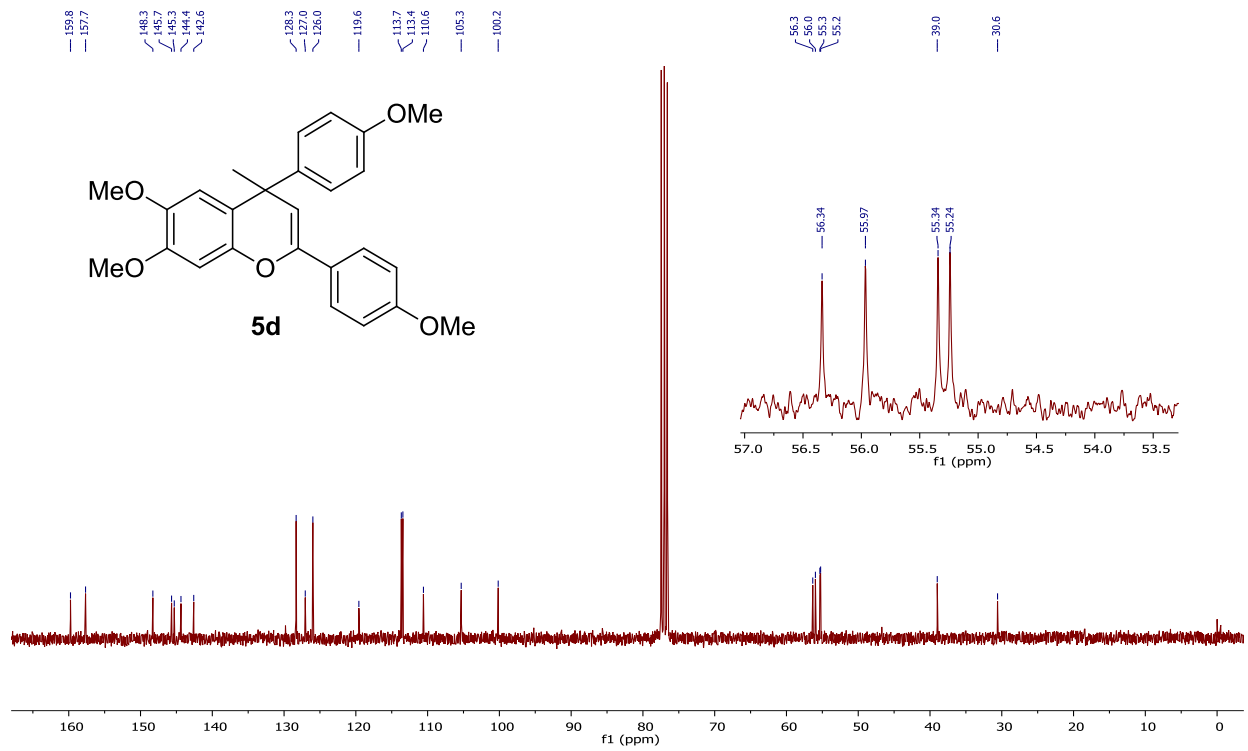

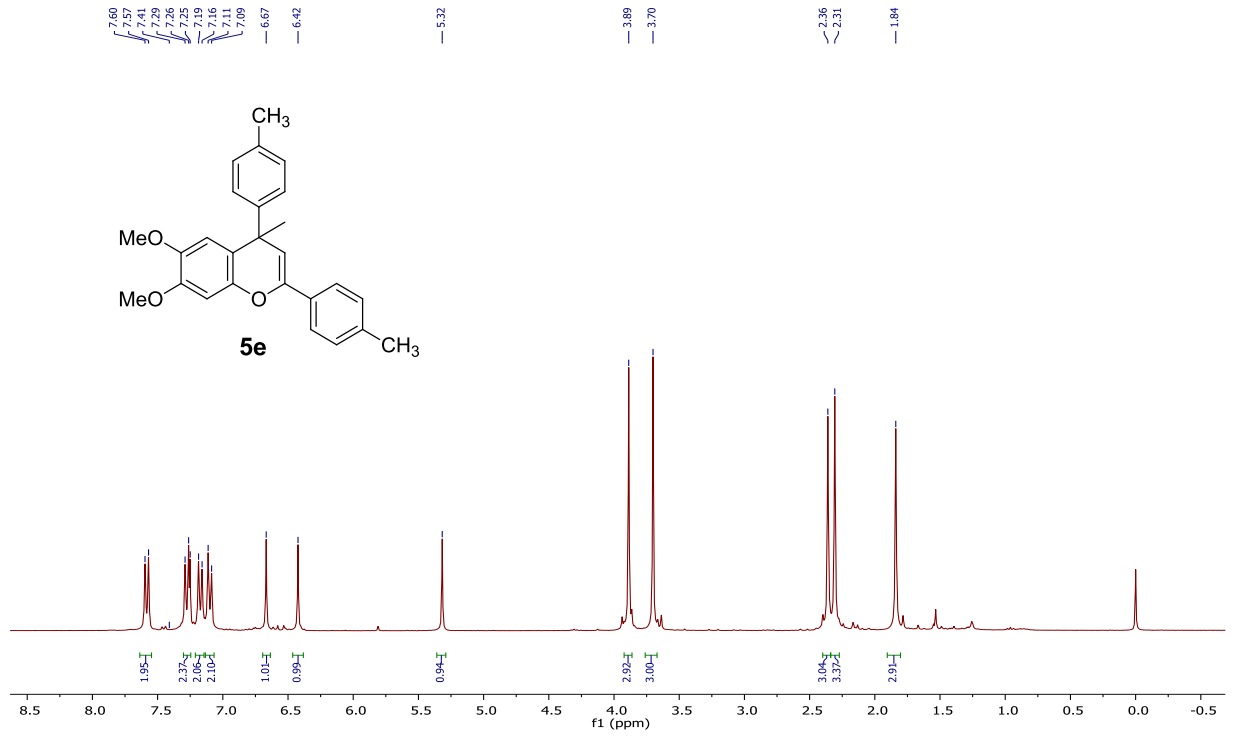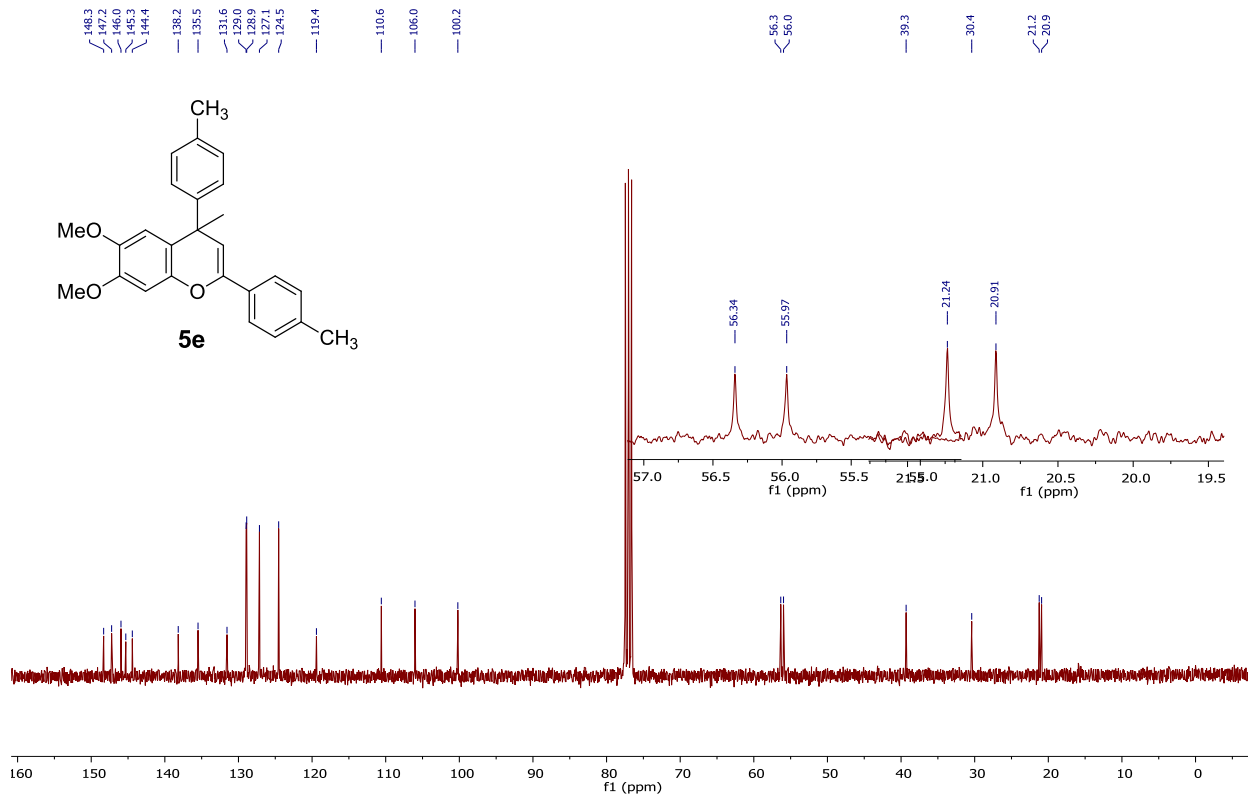

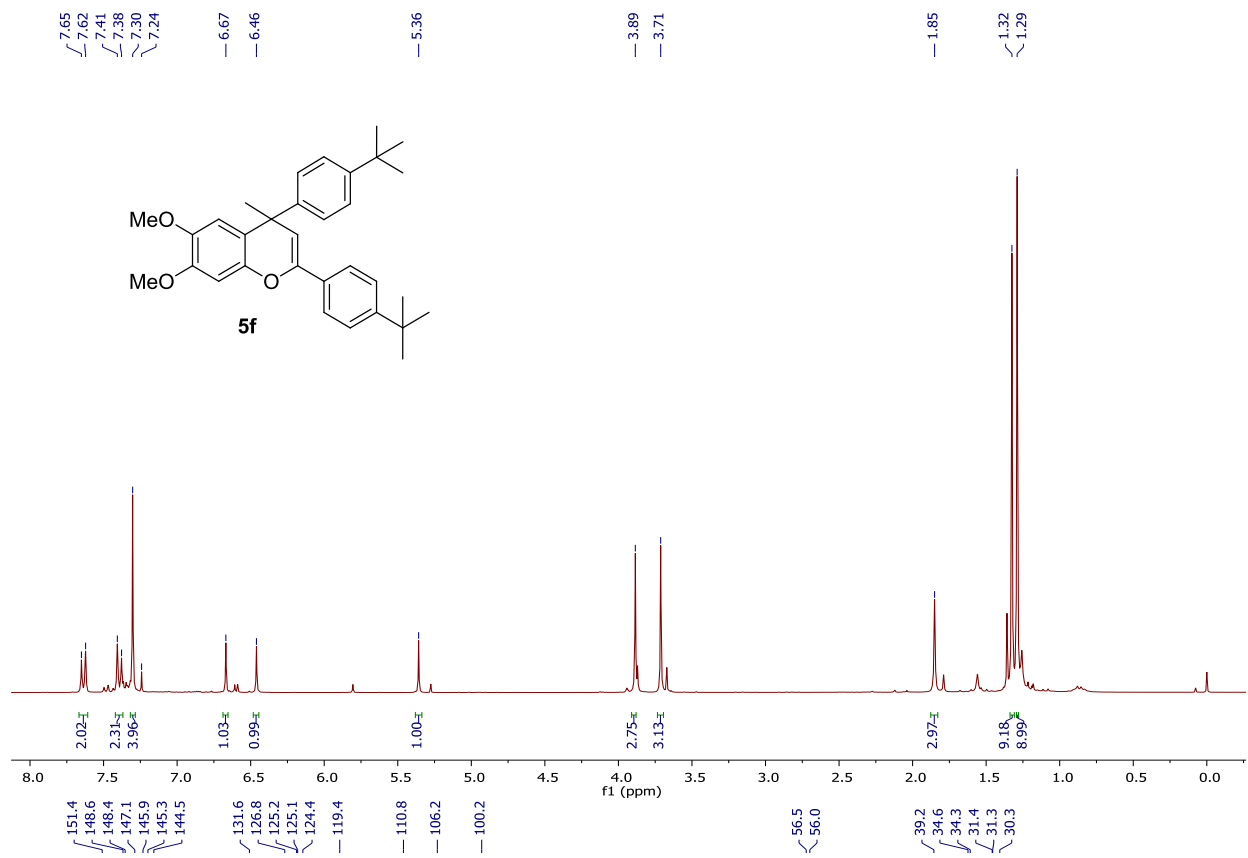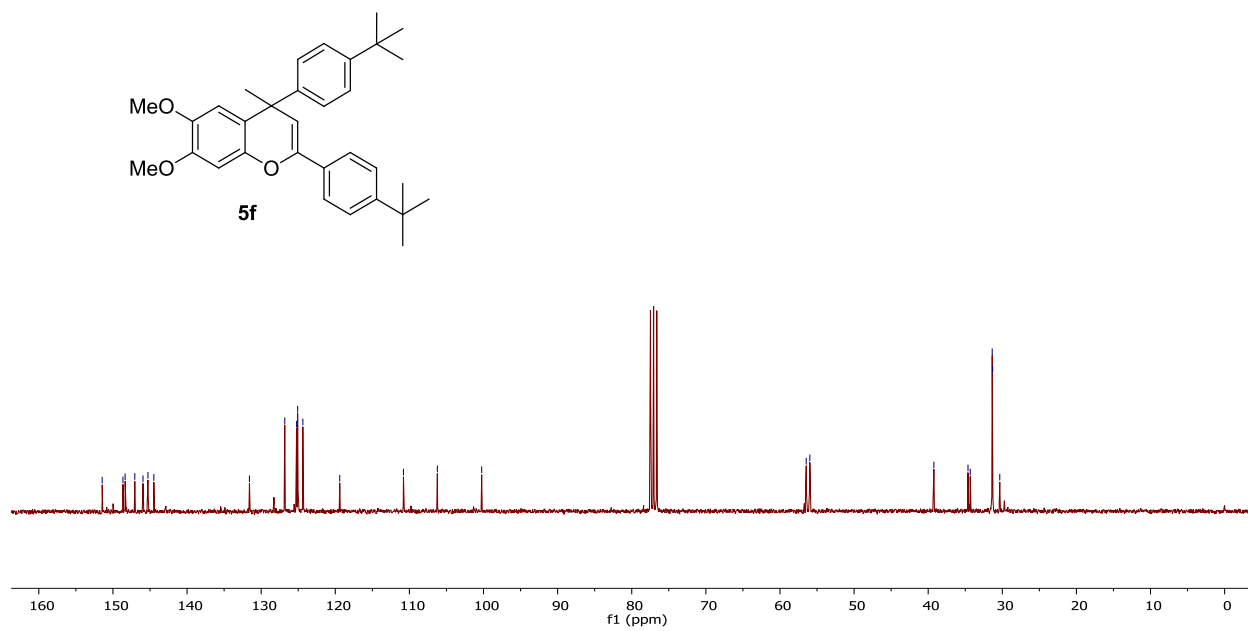

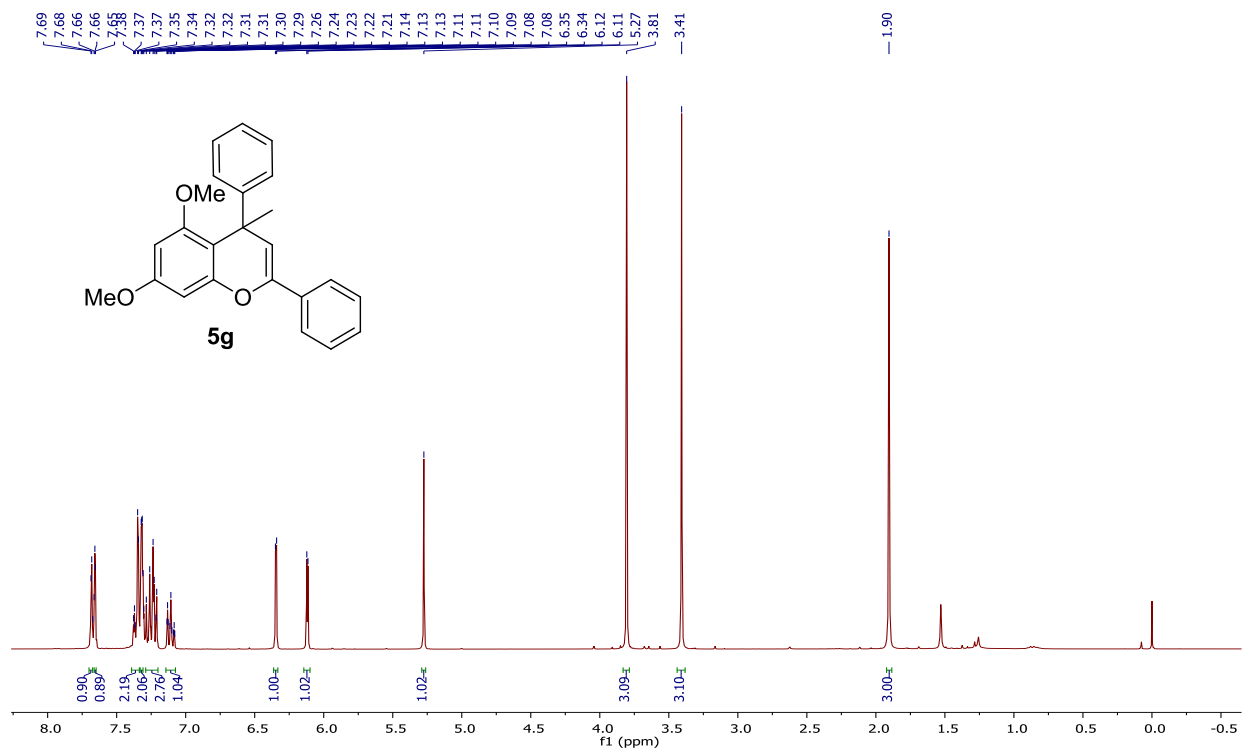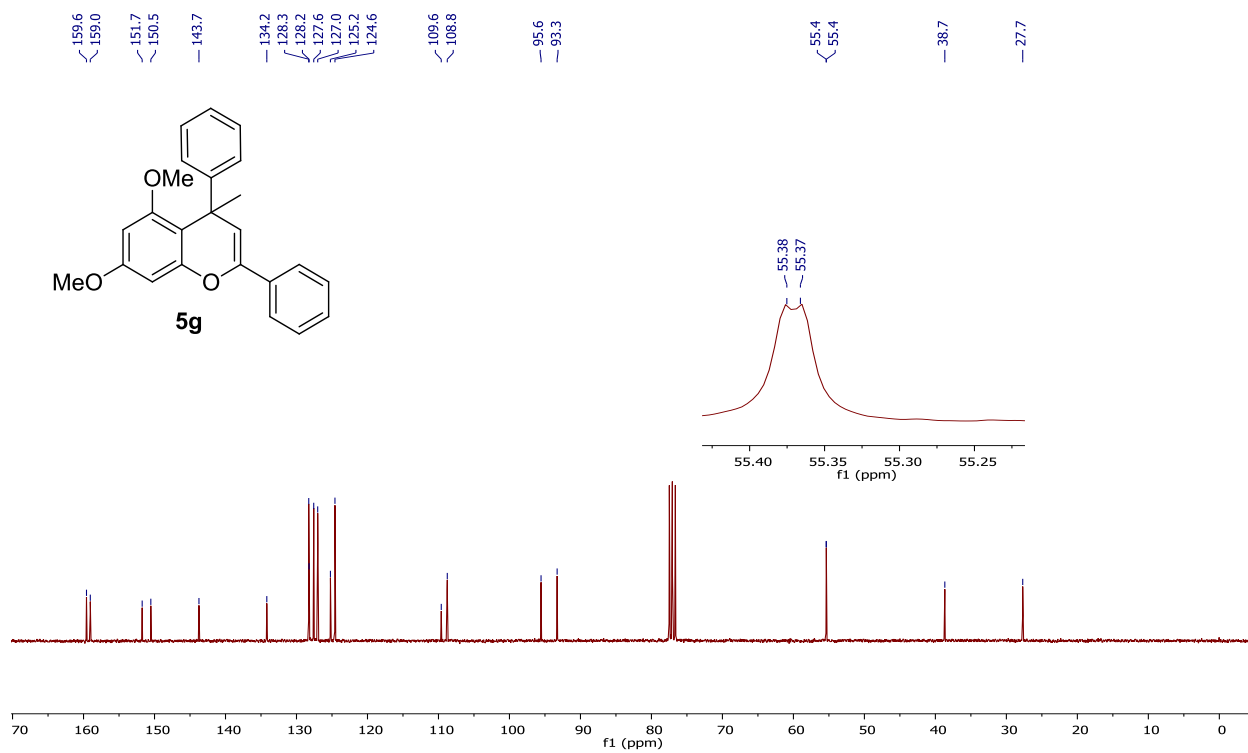

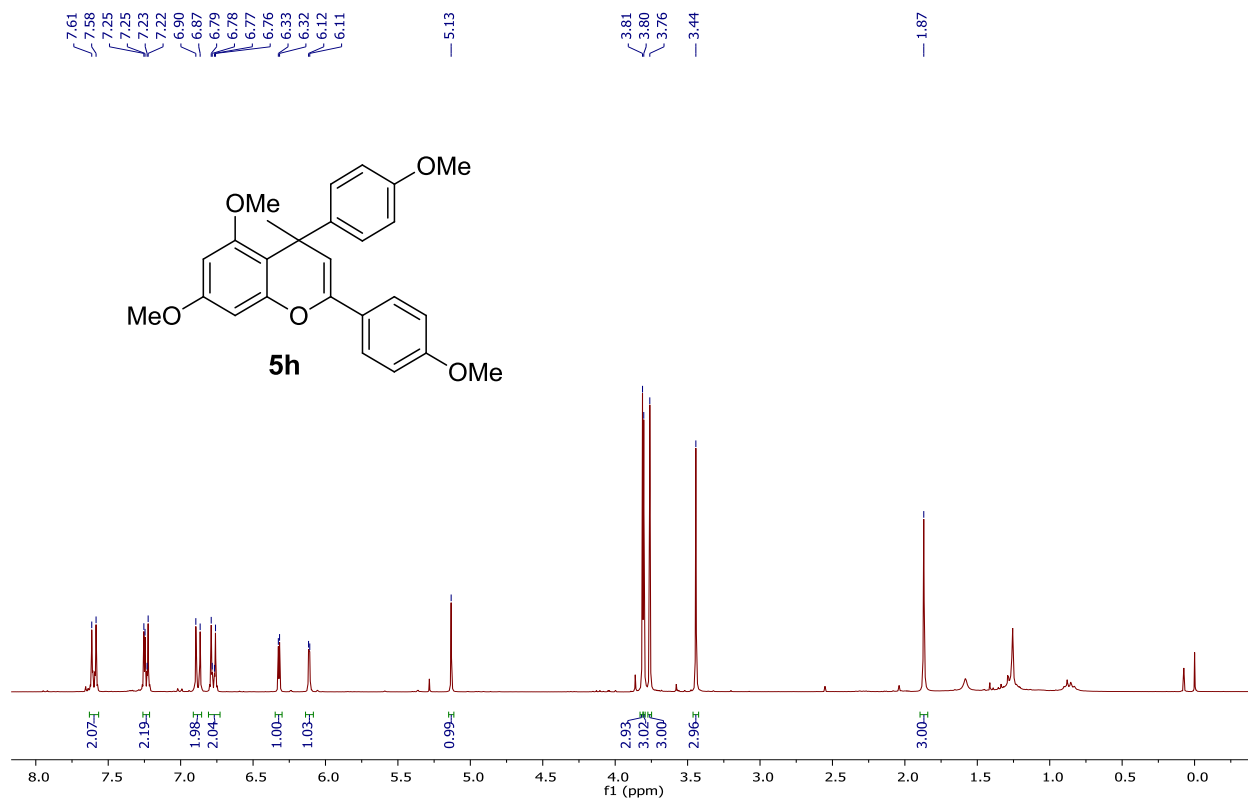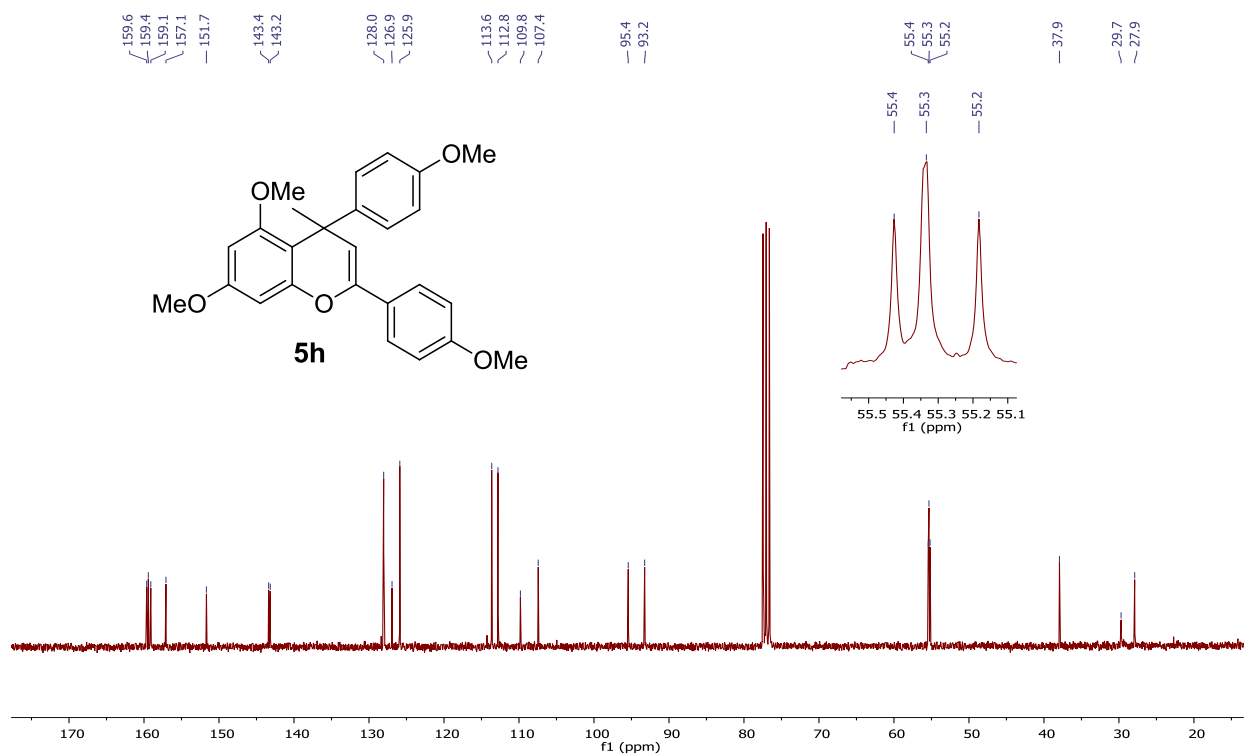

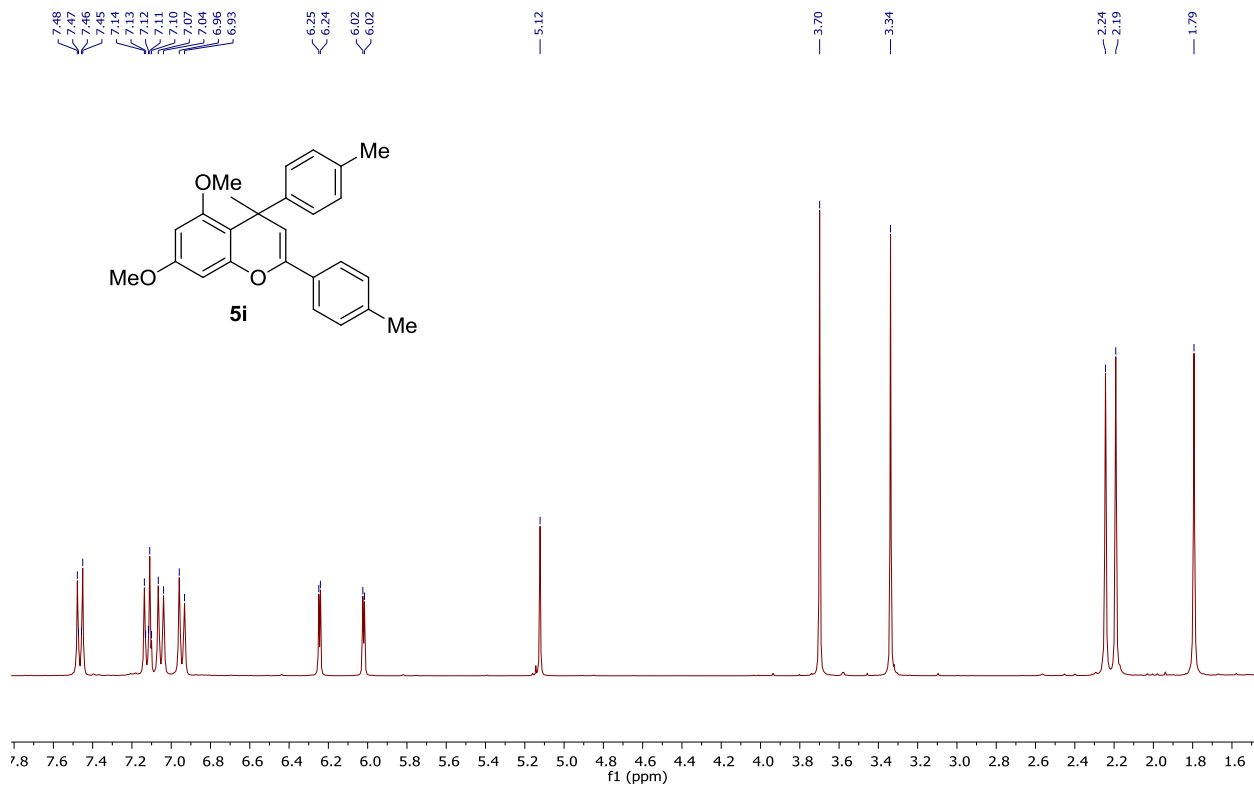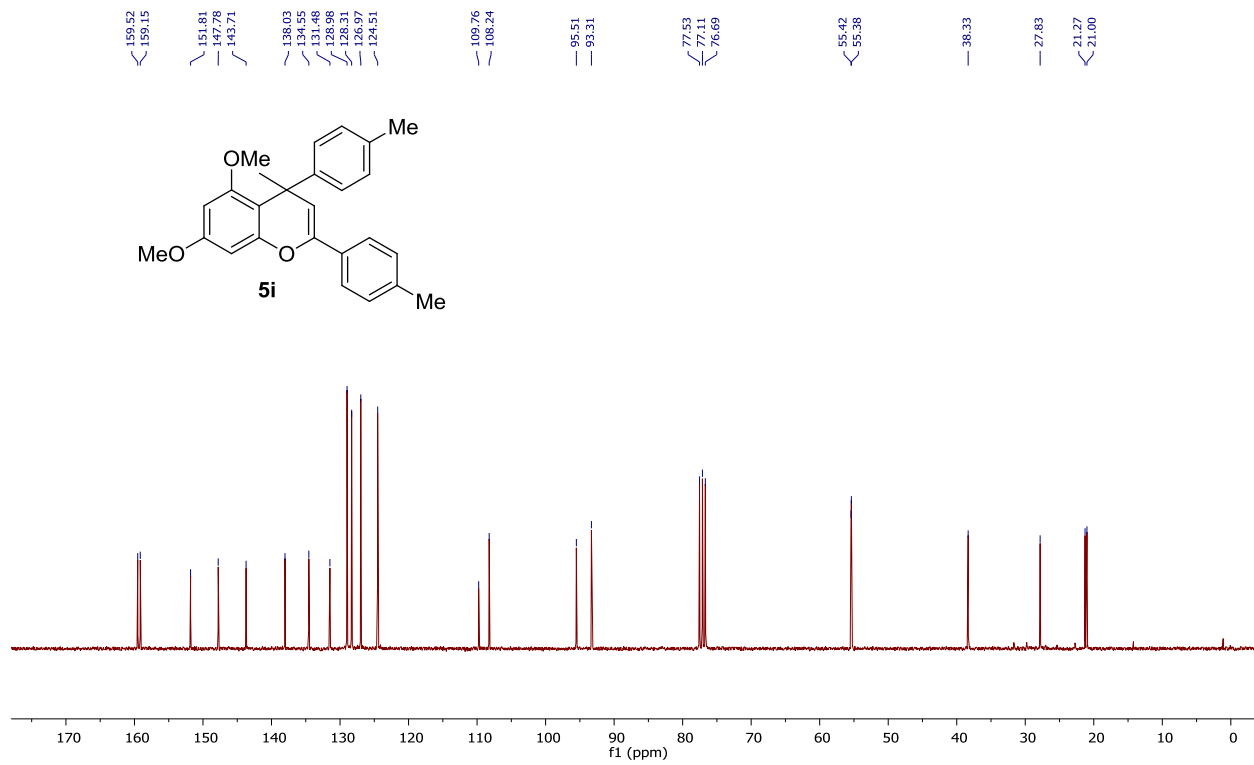

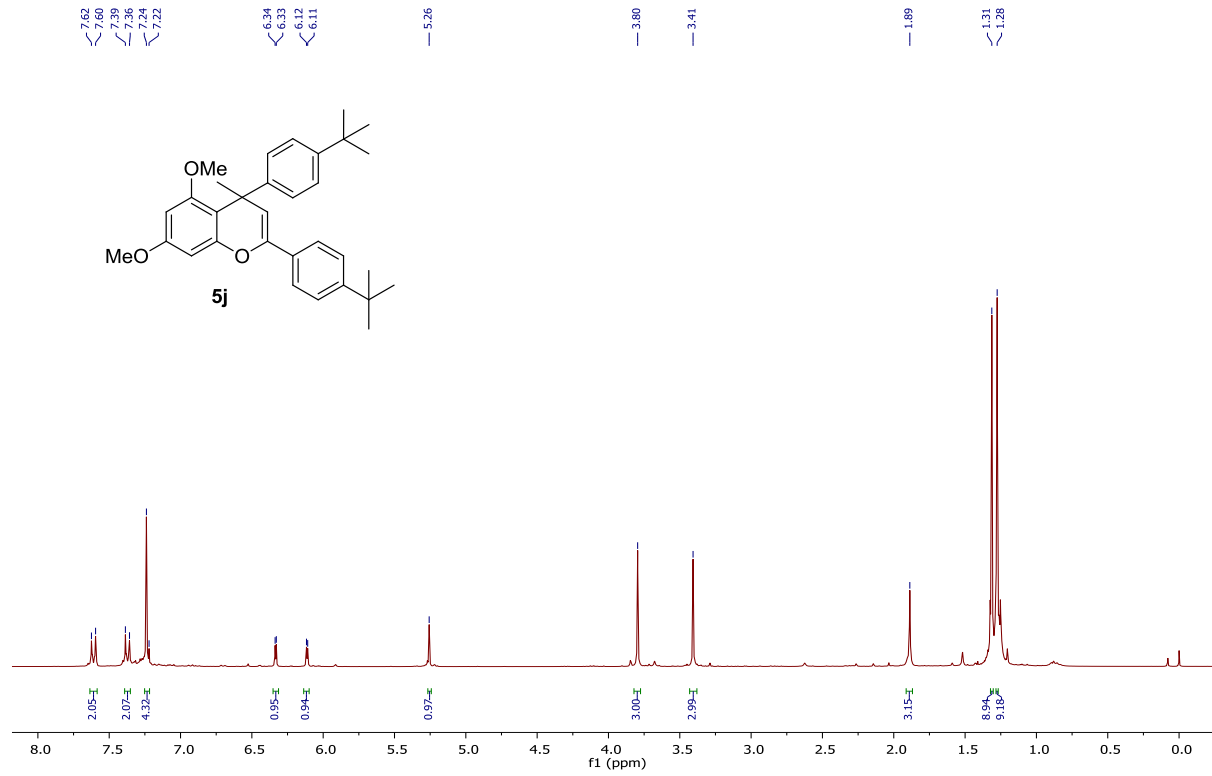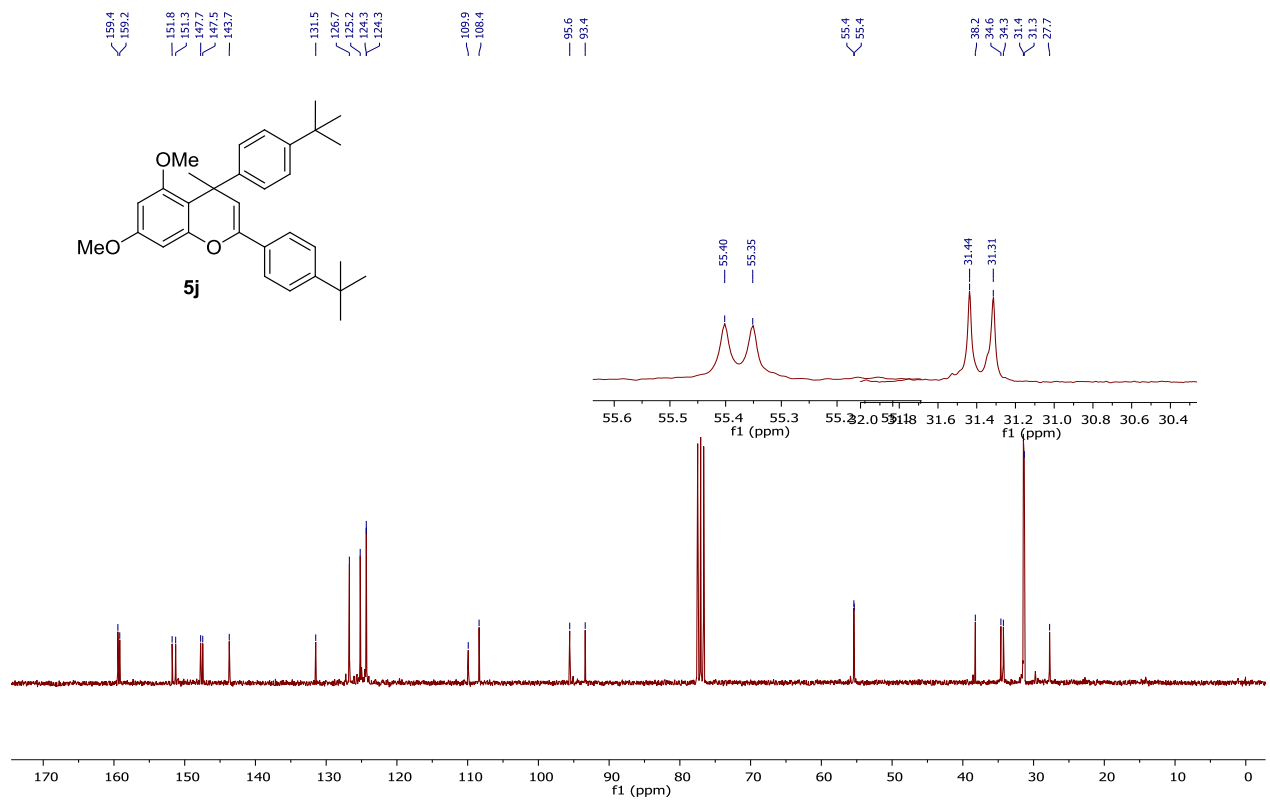



## 2. COSY, HSQC and HMQC spectra of **5i**

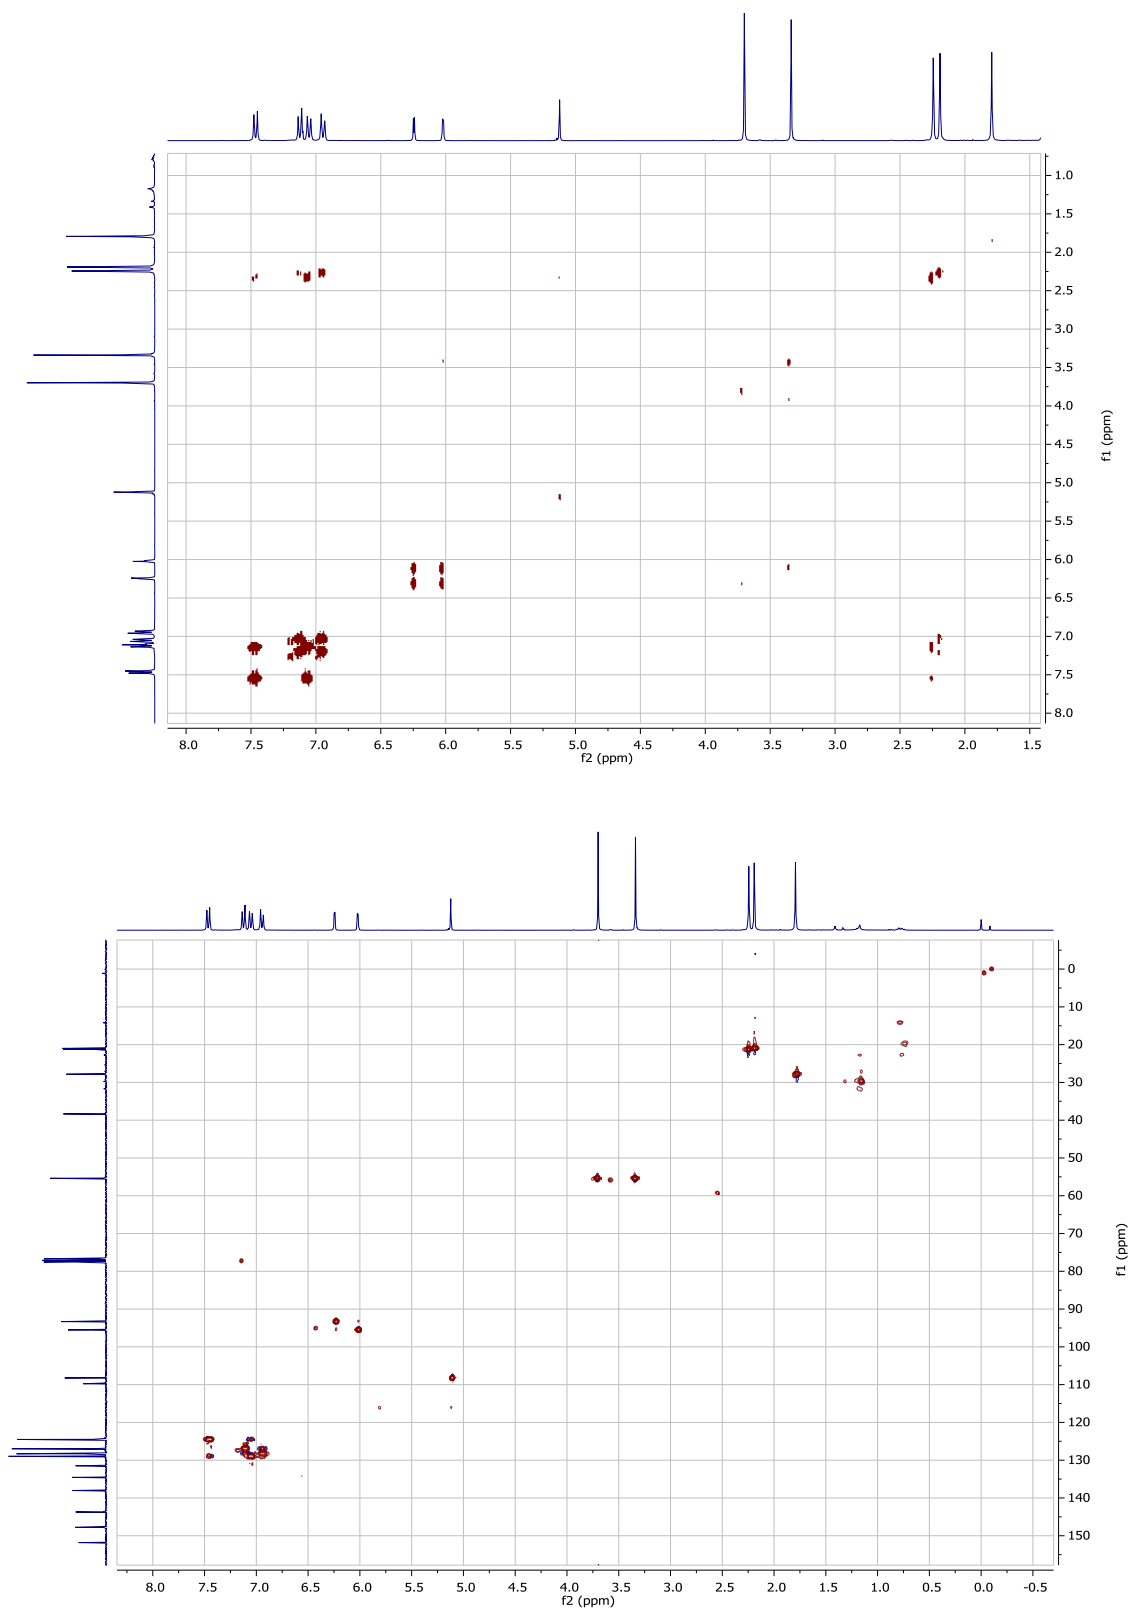

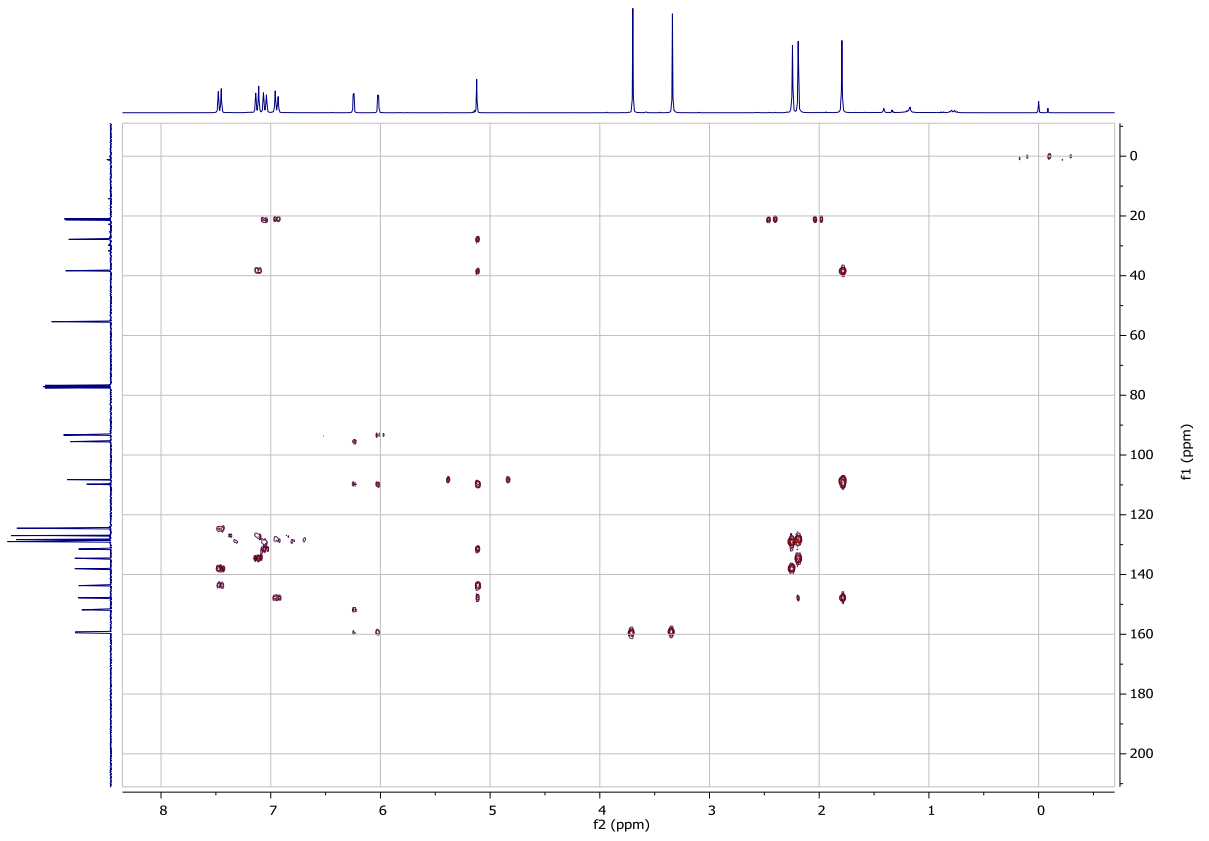

Supplement: c5ob01734c1.pdf [file c5ob01734c1.pdf]
